# Supplementary material for: NRAS and EPHB6 mutation rates differ in metastatic melanomas of patients in the North Island versus South Island of New Zealand
Source: PubMed Central journal article supplement (PMC5173039; doi:10.18632/oncotarget.9351), 2016-05-13
Supplement: oncotarget-07-41017-s001.pdf [file oncotarget-07-41017-s001.pdf]

## ***NRAS* and *EPHB6* mutation rates differ in metastatic melanomas of patients in the North Island versus South Island of New Zealand**

### **SUPPLEMENTARY TABLE**

**Supplementary Table S1: Concordance of mutation detection by Sanger Sequencing and Sequenom MelaCarta MassARRAY platforms**

**See Supplementary File 1**
